# Supplementary material
Source: Springer Nature journal article supplement (https://www.springermedizin.de/resource/supplementary/12885_2014_4731_MOESM10_ESM.pdf/9467088)
Supplement: MOESM10 [file 9467088]

**A.** Signature for Colon Tumor Metastasis to Liver

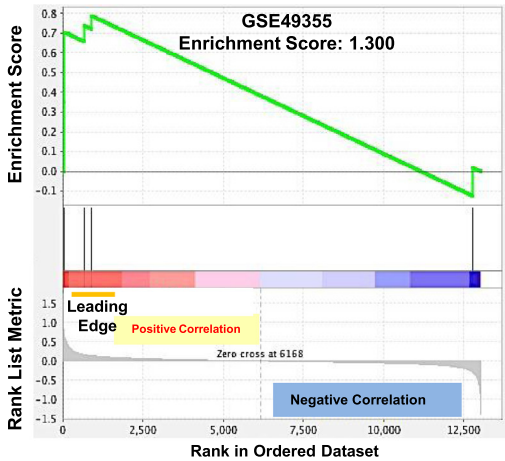

**B.** Signature for Primary Colon Tumor

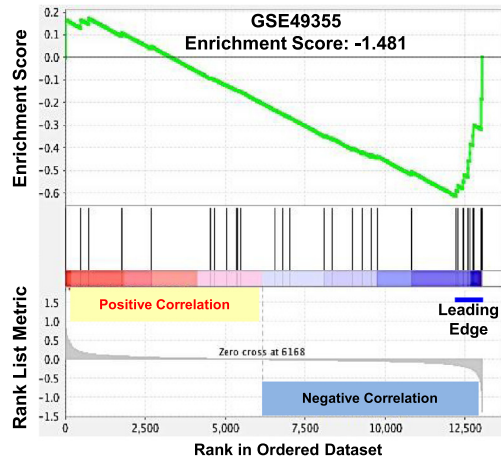

**C.**

|                            |         | GSE6988    | GSE49355   | GSE41258   | GSE28702   |
|----------------------------|---------|------------|------------|------------|------------|
| Liver metastasis signature | HPX     | Yellow     | Yellow     | Yellow     | Yellow     |
|                            | SPP1    | Yellow     | Yellow     | Yellow     | Yellow     |
|                            | COMP    | Yellow     | Yellow     | Light Blue | Yellow     |
|                            | IGFALS  | Dark Grey  | Yellow     | Yellow     | Light Blue |
|                            | FNDC1   | Dark Grey  | Dark Grey  | Dark Grey  | Yellow     |
|                            | BMP1    | Light Blue | Light Blue | Light Blue | Light Blue |
|                            | C1QTNF5 | Light Blue | Dark Grey  | Dark Grey  | Light Blue |

**Legend:**

- Leading edge component enriched in liver metastasis samples
- Non-leading edge but trending to liver metastasis phenotype
- Non-leading edge but trending to primary tumor phenotype
- Leading edge component enriched in primary colon tumor samples
- Not determined

**D.**

|                                  |          | GSE6988    | GSE49355   | GSE41258   | GSE28702   |
|----------------------------------|----------|------------|------------|------------|------------|
| Primary colorectal tumor samples | MMP1     | Blue       | Blue       | Blue       | Blue       |
|                                  | MMP11    | Blue       | Blue       | Blue       | Blue       |
|                                  | MMP2     | Blue       | Blue       | Blue       | Blue       |
|                                  | LEFTY1   | Dark Grey  | Blue       | Light Blue | Blue       |
|                                  | EMID1    | Dark Grey  | Blue       | Light Blue | Blue       |
|                                  | MMP12    | Dark Grey  | Blue       | Blue       | Light Blue |
|                                  | LEPRE1   | Light Blue | Blue       | Blue       | Yellow     |
|                                  | MFGE8    | Light Blue | Blue       | Blue       | Yellow     |
|                                  | MMP9     | Blue       | Blue       | Blue       | Yellow     |
|                                  | FMOD     | Blue       | Light Blue | Blue       | Yellow     |
|                                  | MMRN1    | Dark Grey  | Light Blue | Light Blue | Blue       |
|                                  | MUC13    | Blue       | Yellow     | Light Blue | Light Blue |
|                                  | MMRN2    | Yellow     | Blue       | Light Blue | Light Blue |
|                                  | CSPG4    | Light Blue | Blue       | Yellow     | Light Blue |
|                                  | PLXND1   | Dark Grey  | Blue       | Blue       | Yellow     |
|                                  | FGL2     | Light Blue | Yellow     | Blue       | Light Blue |
|                                  | ADAM10   | Yellow     | Light Blue | Light Blue | Light Blue |
|                                  | SERPINF1 | Light Blue | Light Blue | Blue       | Light Blue |
|                                  | TGFB1    | Yellow     | Light Blue | Blue       | Yellow     |
|                                  | ADAM9    | Dark Grey  | Light Blue | Blue       | Yellow     |
|                                  | LOXL1    | Dark Grey  | Light Blue | Blue       | Yellow     |
|                                  | C15orf44 | Dark Grey  | Light Blue | Light Blue | Light Blue |
|                                  | SPARC    | Yellow     | Light Blue | Light Blue | Light Blue |
|                                  | S100A14  | Light Blue | Light Blue | Light Blue | Light Blue |
|                                  | SVEP1    | Dark Grey  | Light Blue | Yellow     | Light Blue |
|                                  | CLEC11A  | Light Blue | Light Blue | Yellow     | Light Blue |
|                                  | PLOD3    | Light Blue | Light Blue | Yellow     | Light Blue |
|                                  | PLXNB2   | Light Blue | Light Blue | Yellow     | Light Blue |
|                                  | S100A11  | Light Blue | Light Blue | Yellow     | Light Blue |
|                                  | MEGF8    | Dark Grey  | Light Blue | Light Blue | Yellow     |
|                                  | ADAMTSL1 | Yellow     | Dark Grey  | Dark Grey  | Light Blue |
|                                  | S100A16  | Light Blue | Dark Grey  | Dark Grey  | Light Blue |
|                                  | SERPINA3 | Yellow     | Light Blue | Light Blue | Light Blue |
|                                  | FCN1     | Yellow     | Light Blue | Light Blue | Light Blue |
|                                  | PLOD2    | Yellow     | Light Blue | Light Blue | Light Blue |
|                                  | PAPLN    | Dark Grey  | Dark Grey  | Dark Grey  | Yellow     |
